# Supplementary material
Source: HighWire-hosted journal article supplement (https://bmjopen.bmj.com/content/7/2/e013255)
Supplement: inline-supplementary-material-1 [file inline-supplementary-material-1.pdf]

## **Supplementary Appendix**

### **Methodology for adjusted extrapolation to the United Kingdom (UK) population**

Findings on the number of patients treated according to National Institute for Health and Care Excellence (NICE) 2014 guidelines were extrapolated to the UK population via the following methodology that accounted for adjustments by patient demographic and clinical profiles. The study cohort was initially divided into mutually exclusive strata based on status representing presence of coronary heart disease (CHD; including recent acute coronary syndrome [ACS] and other CHD), ischaemic stroke / transient ischaemic attack (TIA), peripheral arterial disease (PAD), diabetes mellitus (DM), chronic kidney disease (CKD), dichotomous age groups (20–70 years versus  $\geq 70$  years), and gender. An example of strata would be a profile representing male, aged  $\geq 70$  years, with CHD and DM. Differential weights by these mutually exclusive strata were then estimated via an optimisation algorithm to minimise the difference between estimated totals for aggregate categories (not mutually exclusive) representing CHD, ischaemic stroke/TIA, PAD, DM, CKD, age groups, and gender, and their reported prevalence in the UK based on published sources. The estimated weights by strata were then utilised to scale the results. The methodology helped ensure the extrapolation accounted for differential scaling by patient profiles and eliminated double counting due to overlap between conditions. Estimation of weights via optimisation methodology was conducted using Excel Solver.

## Methodology for estimation of QRISK2 10-year risk

The QRISK2 10-year risk was estimated only for the non-ASCVD T2DM population in our study. It was estimated as:  $\text{Risk} = 1 - S_0^{\exp(\sum \beta_i X_i)}$ , with  $S_0$  and  $\beta_i$  obtained from the QResearch® group at <https://github.com/robdyke/clinrisk-qRisk2/tree/master/QRISK2-2015-1qpl-source>. The calculation was validated by comparing the calculated result for 50 random patients with the online version of the QRISK2 risk calculator, available at: <https://qrisk.org/2016>. In case a variable (e.g. BP) was not available as of the index date, an older value was searched and the most recent data was utilised. In case the value for a particular variable was completely missing, the calculation was conducted without adding the corresponding  $\beta_i X_i$  term, which effectively meant an incremental regression of the 10-year risk estimate towards  $S_0$ , denoting an approximately 1% 10-year risk. In other words, any missing data resulted in a calculation that made it more likely that a patient would not qualify under 10-year risk  $\geq 10\%$  criterion. Approximately 20% of the non-ASCVD T2DM population had at least one missing variable for the estimation of QRISK2 10-year risk, with more than 90% of these instances representing missing data on the social deprivation index.

## SUPPLEMENTAL TABLE S1. Standardised Diagnostic Read Codes Used to Define Patient Cohorts

| ASCVD   |                                                      |
|---------|------------------------------------------------------|
| ACS     |                                                      |
| G30..00 | ACUTE MYOCARDIAL INFARCTION                          |
| G30..11 | ATTACK - HEART                                       |
| G30..12 | Coronary thrombosis                                  |
| G30..13 | CARDIAC RUPTURE FOLLOWING MYOCARDIAL INFARCTION (MI) |
| G30..14 | HEART ATTACK                                         |
| G30..15 | MI - ACUTE MYOCARDIAL INFARCTION                     |
| G30..16 | Thrombosis - coronary                                |
| G300.00 | ACUTE ANTEROLATERAL INFARCTION                       |
| G301.00 | OTHER SPECIFIED ANTERIOR MYOCARDIAL INFARCTION       |
| G301000 | ACUTE ANTEROAPICAL INFARCTION                        |
| G301100 | ACUTE ANTEROSEPTAL INFARCTION                        |
| G301z00 | ANTERIOR MYOCARDIAL INFARCTION NOS                   |
| G302.00 | ACUTE INFEROLATERAL INFARCTION                       |
| G303.00 | ACUTE INFEROPOSTERIOR INFARCTION                     |
| G304.00 | POSTERIOR MYOCARDIAL INFARCTION NOS                  |
| G305.00 | LATERAL MYOCARDIAL INFARCTION NOS                    |
| G306.00 | TRUE POSTERIOR MYOCARDIAL INFARCTION                 |
| G307.00 | ACUTE SUBENDOCARDIAL INFARCTION                      |
| G307000 | ACUTE NON-Q WAVE INFARCTION                          |
| G307100 | ACUTE NON-ST SEGMENT ELEVATION MYOCARDIAL INFARCTION |
| G308.00 | INFERIOR MYOCARDIAL INFARCTION NOS                   |
| G309.00 | ACUTE Q-WAVE INFARCT                                 |
| G30B.00 | ACUTE POSTEROLATERAL MYOCARDIAL INFARCTION           |

|         |                                                                     |
|---------|---------------------------------------------------------------------|
| G30X.00 | ACUTE TRANSMURAL MYOCARDIAL INFARCTION OF UNSPECIFIED SITE          |
| G30X000 | ACUTE ST SEGMENT ELEVATION MYOCARDIAL INFARCTION                    |
| G30y.00 | OTHER ACUTE MYOCARDIAL INFARCTION                                   |
| G30y000 | ACUTE ATRIAL INFARCTION                                             |
| G30y100 | ACUTE PAPILLARY MUSCLE INFARCTION                                   |
| G30y200 | ACUTE SEPTAL INFARCTION                                             |
| G30yz00 | OTHER ACUTE MYOCARDIAL INFARCTION NOS                               |
| G30z.00 | ACUTE MYOCARDIAL INFARCTION NOS                                     |
| G31..00 | Other acute and subacute ischaemic heart disease                    |
| G310.00 | Postmyocardial infarction syndrome                                  |
| G310.11 | Dressler's syndrome                                                 |
| G311500 | Acute coronary syndrome                                             |
| G312.00 | Coronary thrombosis not resulting in myocardial infarction          |
| G31y.00 | Other acute and subacute ischaemic heart disease                    |
| G31y000 | Acute coronary insufficiency                                        |
| G31y100 | MICROINFARCTION OF HEART                                            |
| G31y200 | Subendocardial ischaemia                                            |
| G31y300 | Transient myocardial ischaemia                                      |
| G31yz00 | Other acute and subacute ischaemic heart disease NOS                |
| G35..00 | Subsequent myocardial infarction                                    |
| G350.00 | Subsequent myocardial infarction of anterior wall                   |
| G351.00 | Subsequent myocardial infarction of inferior wall                   |
| G353.00 | Subsequent myocardial infarction of other sites                     |
| G35X.00 | Subsequent myocardial infarction of unspecified site                |
| G36..00 | Certain current complication follow acute myocardial infarct        |
| G360.00 | Haemopericardium/current comp following acute myocardial infarction |

|         |                                                                                                  |
|---------|--------------------------------------------------------------------------------------------------|
| G361.00 | Atrial septal defect/current comp following acute myocardial infarction                          |
| G362.00 | Ventric septal defect/current comp following acute myocardial infarction                         |
| G363.00 | Rupture of cardiac wall without haemopericard/current comp following acute myocardial infarction |
| G364.00 | Ruptur chordae tendinae/current comp following acute myocardial infarction                       |
| G365.00 | Rupture papillary muscle/current comp following acute myocardial infarction                      |
| G366.00 | Thrombosis atrium,auric appendvent/current comp following acute myocardial infarction            |
| G38..00 | Postoperative myocardial infarction                                                              |
| G380.00 | Postoperative transmural myocardial infarction anterior wall                                     |
| G381.00 | Postoperative transmural myocardial infarction inferior wall                                     |
| G382.00 | Postoperative transmural myocardial infarction other sites                                       |
| G383.00 | Postoperative transmural myocardial infarction unspecified site                                  |
| G384.00 | Postoperative subendocardial myocardial infarction                                               |
| G38z.00 | Postoperative myocardial infarction, unspecified                                                 |
| Gyu3400 | [X]ACUTE TRANSMURAL MYOCARDIAL INFARCTION OF UNSPECIFIED SITE                                    |
| Gyu3500 | [X]Subsequent myocardial infarction of other sites                                               |
| Gyu3600 | [X]Subsequent myocardial infarction of unspecified site                                          |
| G311.00 | Preinfarction syndrome                                                                           |
| G311.11 | Crescendo angina                                                                                 |
| G311.12 | Impending infarction                                                                             |
| G311.13 | Unstable angina                                                                                  |
| G311.14 | Angina at rest                                                                                   |
| G311000 | Myocardial infarction aborted                                                                    |
| G311011 | MI - myocardial infarction aborted                                                               |
| G311100 | Unstable angina                                                                                  |
| G311200 | Angina at rest                                                                                   |
| G311300 | Refractory angina                                                                                |

|           |                                                              |
|-----------|--------------------------------------------------------------|
| G311400   | Worsening angina                                             |
| G311z00   | Preinfarction syndrome NOS                                   |
| G330.00   | Angina decubitus                                             |
| G330000   | Nocturnal angina                                             |
| G330z00   | Angina decubitus NOS                                         |
| G33z500   | Post infarct angina                                          |
| G33z600   | New onset angina                                             |
| Other CHD |                                                              |
| 792E000   | Emergency percutaneous coronary intervention                 |
| 7920.00   | SAPHENOUS VEIN GRAFT REPLACEMENT OF CORONARY ARTERY          |
| 7920.11   | SAPHENOUS VEIN GRAFT BYPASS OF CORONARY ARTERY               |
| 7921.00   | OTHER AUTOGRAFT REPLACEMENT OF CORONARY ARTERY               |
| 7921.11   | OTHER AUTOGRAFT BYPASS OF CORONARY ARTERY                    |
| 7922.00   | ALLOGRAFT REPLACEMENT OF CORONARY ARTERY                     |
| 7922.11   | ALLOGRAFT BYPASS OF CORONARY ARTERY                          |
| 7923.00   | PROSTHETIC REPLACEMENT OF CORONARY ARTERY                    |
| 7923.11   | PROSTHETIC BYPASS OF CORONARY ARTERY                         |
| 7924.00   | REVISION OF BYPASS FOR CORONARY ARTERY                       |
| 7925.00   | CONNECTION OF MAMMARY ARTERY TO CORONARY ARTERY              |
| 7925.11   | CREATION OF BYPASS FROM MAMMARY ARTERY TO CORONARY ARTERY    |
| 7926.00   | CONNECTION OF OTHER THORACIC ARTERY TO CORONARY ARTERY       |
| 7927.00   | OTHER OPEN OPERATIONS ON CORONARY ARTERY                     |
| 7928.00   | TRANSLUMINAL BALLOON ANGIOPLASTY OF CORONARY ARTERY          |
| 7928.11   | PERCUTANEOUS BALLOON CORONARY ANGIOPLASTY                    |
| 7929.00   | OTHER THERAPEUTIC TRANSLUMINAL OPERATIONS ON CORONARY ARTERY |
| 7920000   | SAPHENOUS VEIN GRAFT REPLACEMENT OF ONE CORONARY ARTERY      |

|         |                                                              |
|---------|--------------------------------------------------------------|
| 7920100 | SAPHENOUS VEIN GRAFT REPLACEMENT OF TWO CORONARY ARTERIES    |
| 7920200 | SAPHENOUS VEIN GRAFT REPLACEMENT OF THREE CORONARY ARTERIES  |
| 7920300 | SAPHENOUS VEIN GRAFT REPLACEMENT OF FOUR+ CORONARY ARTERIES  |
| 7921000 | AUTOGRAFT REPLACEMENT OF ONE CORONARY ARTERY NEC             |
| 7921100 | AUTOGRAFT REPLACEMENT OF TWO CORONARY ARTERIES NEC           |
| 7921200 | AUTOGRAFT REPLACEMENT OF THREE CORONARY ARTERIES NEC         |
| 7921300 | AUTOGRAFT REPLACEMENT OF FOUR OF MORE CORONARY ARTERIES NEC  |
| 7922000 | ALLOGRAFT REPLACEMENT OF ONE CORONARY ARTERY                 |
| 7922100 | ALLOGRAFT REPLACEMENT OF TWO CORONARY ARTERIES               |
| 7922200 | ALLOGRAFT REPLACEMENT OF THREE CORONARY ARTERIES             |
| 7922300 | ALLOGRAFT REPLACEMENT OF FOUR+ CORONARY ARTERIES             |
| 7923000 | PROSTHETIC REPLACEMENT OF ONE CORONARY ARTERY                |
| 7923100 | PROSTHETIC REPLACEMENT OF TWO CORONARY ARTERIES              |
| 7923200 | PROSTHETIC REPLACEMENT OF THREE CORONARY ARTERIES            |
| 7923300 | PROSTHETIC REPLACEMENT OF FOUR+ CORONARY ARTERIES            |
| 7924000 | REVISION OF BYPASS FOR ONE CORONARY ARTERY                   |
| 7924100 | REVISION OF BYPASS FOR TWO CORONARY ARTERIES                 |
| 7924200 | REVISION OF BYPASS FOR THREE CORONARY ARTERIES               |
| 7924300 | REVISION OF BYPASS FOR FOUR+ CORONARY ARTERIES               |
| 7924400 | REVISION OF CONNECTION OF THORACIC ARTERY TO CORONARY ARTERY |
| 7924500 | REVISION OF IMPLANTATION OF THORACIC ARTERY INTO HEART       |
| 7925000 | DOUBLE ANASTOMOSIS OF MAMMARY ARTERIES TO CORONARY ARTERIES  |
| 7925011 | LIMA sequential anastomosis                                  |
| 7925012 | RIMA sequential anastomosis                                  |
| 7925100 | DOUBLE IMPLANT OF MAMMARY ARTERIES INTO CORONARY ARTERIES    |
| 7925200 | SINGLE ANAST MAMMARY ART TO LEFT ANT DESCEND CORONARY ART    |

|         |                                                                |
|---------|----------------------------------------------------------------|
| 7925300 | SINGLE ANASTOMOSIS OF MAMMARY ARTERY TO CORONARY ARTERY NEC    |
| 7925311 | LIMA single anastomosis                                        |
| 7925312 | RIMA single anastomosis                                        |
| 7925400 | SINGLE IMPLANTATION OF MAMMARY ARTERY INTO CORONARY ARTERY     |
| 7926000 | DOUBLE ANASTOM THORACIC ARTERIES TO CORONARY ARTERIES NEC      |
| 7926100 | DOUBLE IMPLANT THORACIC ARTERIES INTO CORONARY ARTERIES NEC    |
| 7926200 | SINGLE ANASTOMOSIS OF THORACIC ARTERY TO CORONARY ARTERY NEC   |
| 7926300 | SINGLE IMPLANTATION THORACIC ARTERY INTO CORONARY ARTERY NEC   |
| 7927500 | OPEN ANGIOPLASTY OF CORONARY ARTERY                            |
| 7928000 | PERCUT TRANSLUMINAL BALLOON ANGIOPLASTY ONE CORONARY ARTERY    |
| 7928100 | PERCUT TRANSLUM BALLOON ANGIOPLASTY MULT CORONARY ARTERIES     |
| 7928200 | PERCUT TRANSLUM BALLOON ANGIOPLASTY BYPASS GRAFT CORONARY A    |
| 7928300 | PERCUT TRANSLUM CUTTING BALLOON ANGIOPLASTY CORONARY ARTERY    |
| 7929000 | PERCUTANEOUS TRANSLUMINAL LASER CORONARY ANGIOPLASTY           |
| 7929100 | Percut transluminal coronary thrombolysis with streptokinase   |
| 7929111 | Percut translum coronary thrombolytic therapy - streptokinase  |
| 7929200 | PERCUTAN. TRANSLUM. INJECT THERAP SUBST TO CORONARY ARTERY NEC |
| 7929200 | Percut translum inject therap subst to coronary artery NEC     |
| 7929300 | ROTARY BLADE CORONARY ANGIOPLASTY                              |
| 7929400 | INSERTION OF CORONARY ARTERY STENT                             |
| 7929500 | INSERTION OF DRUG-ELUTING CORONARY ARTERY STENT                |
| 7929600 | PERCUTANEOUS TRANSLUMINAL ATHERECTOMY OF CORONARY ARTERY       |
| 790H300 | Revascularisation of wall of heart                             |
| 792..00 | CORONARY ARTERY OPERATIONS                                     |
| 792..11 | CORONARY ARTERY BYPASS GRAFT OPERATIONS                        |
| 7920y00 | SAPHENOUS VEIN GRAFT REPLACEMENT OF CORONARY ARTERY OS         |



|         |                                                            |
|---------|------------------------------------------------------------|
| 7920z00 | SAPHENOUS VEIN GRAFT REPLACEMENT CORONARY ARTERY NOS       |
| 7921y00 | OTHER AUTOGRAFT REPLACEMENT OF CORONARY ARTERY OS          |
| 7921z00 | OTHER AUTOGRAFT REPLACEMENT OF CORONARY ARTERY NOS         |
| 7922y00 | OTHER SPECIFIED ALLOGRAFT REPLACEMENT OF CORONARY ARTERY   |
| 7922z00 | ALLOGRAFT REPLACEMENT OF CORONARY ARTERY NOS               |
| 7923y00 | OTHER SPECIFIED PROSTHETIC REPLACEMENT OF CORONARY ARTERY  |
| 7923z00 | PROSTHETIC REPLACEMENT OF CORONARY ARTERY NOS              |
| 7924y00 | OTHER SPECIFIED REVISION OF BYPASS FOR CORONARY ARTERY     |
| 7924z00 | REVISION OF BYPASS FOR CORONARY ARTERY NOS                 |
| 7925y00 | CONNECTION OF MAMMARY ARTERY TO CORONARY ARTERY OS         |
| 7925z00 | CONNECTION OF MAMMARY ARTERY TO CORONARY ARTERY NOS        |
| 7926y00 | CONNECTION OF OTHER THORACIC ARTERY TO CORONARY ARTERY OS  |
| 7926z00 | CONNECTION OF OTHER THORACIC ARTERY TO CORONARY ARTERY NOS |
| 7927y00 | OTHER SPECIFIED OTHER OPEN OPERATION ON CORONARY ARTERY    |
| 7927z00 | OTHER OPEN OPERATION ON CORONARY ARTERY NOS                |
| 7928y00 | TRANSLUMINAL BALLOON ANGIOPLASTY OF CORONARY ARTERY OS     |
| 7928z00 | TRANSLUMINAL BALLOON ANGIOPLASTY OF CORONARY ARTERY NOS    |
| 7929y00 | OTHER THERAPEUTIC TRANSLUMINAL OP ON CORONARY ARTERY OS    |
| 7929z00 | OTHER THERAPEUTIC TRANSLUMINAL OP ON CORONARY ARTERY NOS   |
| 792A.00 | DIAGNOSTIC TRANSLUMINAL OPERATIONS ON CORONARY ARTERY      |
| 792B.00 | REPAIR OF CORONARY ARTERY NEC                              |
| 792B000 | Endarterectomy of coronary artery NEC                      |
| 792By00 | Other specified repair of coronary artery                  |
| 792Bz00 | Repair of coronary artery NOS                              |
| 792C.00 | OTHER REPLACEMENT OF CORONARY ARTERY                       |
| 792C000 | REPLACEMENT OF CORONARY ARTERIES USING MULTIPLE METHODS    |

|         |                                                                          |
|---------|--------------------------------------------------------------------------|
| 792Cy00 | OTHER SPECIFIED REPLACEMENT OF CORONARY ARTERY                           |
| 792Cz00 | REPLACEMENT OF CORONARY ARTERY NOS                                       |
| 792D.00 | OTHER BYPASS OF CORONARY ARTERY                                          |
| 792Dy00 | OTHER SPECIFIED OTHER BYPASS OF CORONARY ARTERY                          |
| 792Dz00 | OTHER BYPASS OF CORONARY ARTERY NOS                                      |
| 792E.00 | Percutaneous coronary intervention                                       |
| 792y.00 | OTHER SPECIFIED OPERATIONS ON CORONARY ARTERY                            |
| 792z.00 | Coronary artery operations NOS                                           |
| 793G.00 | Perc translumin balloon angioplasty stenting coronary artery             |
| 793G000 | Perc translum balloon angioplasty insert 1-2 drug elut stents cor art    |
| 793G100 | Perc translum balloon angioplasty ins 3 or more drug elut stents cor art |
| 793G200 | Perc translum balloon angioplasty insert 1-2 stents cor art              |
| 793G300 | Percutaneous cor balloon angioplasty 3 more stents cor art NEC           |
| 793Gy00 | OS perc translum balloon angioplasty stenting coronary art               |
| 793Gz00 | Perc translum balloon angioplasty stenting coronary art NOS              |
| 793K.00 | Transluminal operations internal mammary artery side branch              |
| 793K000 | Transluminal occlusion left internal mammary artery side branch          |
| 793Ky00 | OS transluminal operations internal mammary art side branch              |
| 793Kz00 | Transluminal operations internal mammary art side branch NOS             |
| SP00300 | MECHANICAL COMPLICATION OF CORONARY BYPASS                               |
| ZV45700 | [V]Presence of aortocoronary bypass graft                                |
| 3232.00 | ECG: old myocardial infarction                                           |
| 14A3.00 | H/O: myocardial infarct <60                                              |
| 14A4.00 | H/O: myocardial infarct >60                                              |
| 14AH.00 | H/O: Myocardial infarction in last year                                  |
| 14AT.00 | History of myocardial infarction                                         |

|         |                                                      |
|---------|------------------------------------------------------|
| G30..17 | Silent myocardial infarction                         |
| G32..00 | Old myocardial infarction                            |
| G32..11 | Healed myocardial infarction                         |
| G32..12 | Personal history of myocardial infarction            |
| G344.00 | Silent myocardial ischaemia                          |
| 8B3k.00 | Coronary heart disease medication review             |
| 8CMP.00 | Coronary heart disease care plan                     |
| 8CR6.00 | Coronary heart disease risk clinical management plan |
| 8I37.00 | Coronary heart disease monitoring refused            |
| 9Ob..00 | Coronary heart disease monitoring administration     |
| 9Ob0.00 | Attends coronary heart disease monitoring            |
| 9Ob1.00 | Refuses coronary heart disease monitoring            |
| 9Ob2.00 | Coronary heart disease monitoring default            |
| 9Ob3.00 | Coronary heart disease monitoring 1st letter         |
| 9Ob4.00 | Coronary heart disease monitoring 2nd letter         |
| 9Ob5.00 | Coronary heart disease monitoring 3rd letter         |
| 9Ob6.00 | Coronary heart disease monitoring verbal invitation  |
| 9Ob7.00 | Coronary heart disease monitoring deleted            |
| 9Ob8.00 | Coronary heart disease monitoring check done         |
| 9Ob9.00 | Coronary heart disease monitoring telephone invite   |
| G3...11 | Arteriosclerotic heart disease                       |
| G3...12 | Atherosclerotic heart disease                        |
| G34..00 | Other chronic ischaemic heart disease                |
| G340.00 | Coronary atherosclerosis                             |
| G340.11 | Triple vessel disease of the heart                   |
| G340.12 | Coronary artery disease                              |

|         |                                                              |
|---------|--------------------------------------------------------------|
| G340000 | Single coronary vessel disease                               |
| G342.00 | Atherosclerotic cardiovascular disease                       |
| G343.00 | Ischaemic cardiomyopathy                                     |
| G34y.00 | Other specified chronic ischaemic heart disease              |
| G34y000 | Chronic coronary insufficiency                               |
| G34y100 | Chronic myocardial ischaemia                                 |
| G34yz00 | Other specified chronic ischaemic heart disease NOS          |
| G34z.00 | Other chronic ischaemic heart disease NOS                    |
| G34z000 | Asymptomatic coronary heart disease                          |
| G39..00 | Coronary microvascular disease                               |
| 3889.00 | Euroscore for angina                                         |
| 14A5.00 | H/O: angina pectoris                                         |
| 14AJ.00 | H/O: angina in last year                                     |
| 187..00 | Frequency of angina                                          |
| 388E.00 | Canadian Cardiovascular Society classification of angina     |
| 388F.00 | Cardiovascular Limitations and Symptoms Profile angina score |
| 661M000 | Angina self-management plan agreed                           |
| 661N000 | Angina self-management plan review                           |
| 662K.00 | Angina control                                               |
| 662K000 | Angina control - good                                        |
| 662K100 | Angina control - poor                                        |
| 662K200 | Angina control - improving                                   |
| 662K300 | Angina control - worsening                                   |
| 662Kz00 | Angina control NOS                                           |
| 8B27.00 | Antianginal therapy                                          |
| 8IEY.00 | Referral to Angina Plan self-management programme declined   |

|                      |                                                             |
|----------------------|-------------------------------------------------------------|
| 8T04.00              | Referral to Angina Plan self-management programme           |
| G33..00              | Angina pectoris                                             |
| G331.11              | Variant angina pectoris                                     |
| G33z.00              | Angina pectoris NOS                                         |
| G33z000              | Status anginosus                                            |
| G33z100              | Stenocardia                                                 |
| G33z200              | Syncope anginosa                                            |
| G33z300              | Angina on effort                                            |
| G33z400              | Ischaemic chest pain                                        |
| G33z700              | Stable angina                                               |
| G33zz00              | Angina pectoris NOS                                         |
| Gyu3000              | [X]Other forms of angina pectoris                           |
| J421.11              | Angina - abdominal                                          |
| ZR37.00              | Canadian Cardiovascular Society classification of angina    |
| ZR3P.00              | CLASP angina score                                          |
| ZR3P.11              | CLASP angina score                                          |
| ZRB1.00              | Euroscore for angina                                        |
| Ischaemic stroke/TIA |                                                             |
| G63..11              | Infarction - precerebral                                    |
| G632.00              | Vertebral artery occlusion                                  |
| G633.00              | Multiple and bilateral precerebral arterial occlus          |
| G63y000              | Cerebral infarct due to thrombosis of precerebral arteries  |
| G63y100              | Cerebral infarction due to embolism of precerebral arteries |
| G64..00              | Cerebral arterial occlusion                                 |
| G64..11              | CVA - cerebral artery occlusion                             |
| G64..12              | Infarction - cerebral                                       |

|         |                                                            |
|---------|------------------------------------------------------------|
| G64..13 | Stroke due to cerebral arterial occlusion                  |
| G640.00 | Cerebral thrombosis                                        |
| G640000 | Cerebral infarction due to thrombosis of cerebral          |
| G64z.00 | Cerebral infarction NOS                                    |
| G64z.11 | Brainstem infarction NOS                                   |
| G64z.12 | Cerebellar infarction                                      |
| G64z000 | Brainstem infarction                                       |
| G64z100 | Wallenberg syndrome                                        |
| G64z200 | Left sided cerebral infarction                             |
| G64z300 | Right sided cerebral infarction                            |
| G64z400 | Infarction of basal ganglia                                |
| G671000 | Acute cerebrovascular insufficiency NOS                    |
| G677000 | Occlusion and stenosis of middle cerebral artery           |
| G677100 | Occlusion and stenosis of anterior cerebral artery         |
| G677200 | Occlusion and stenosis of posterior cerebral arter         |
| G677300 | Occlusion and stenosis of cerebellar arteries              |
| G677400 | Occlusion and stenosis of multiple and bilat cerebral      |
| G6W..00 | Cereb infarct due unsp occlus/stenos precerebr art         |
| G6W..00 | Cereb infarct due unsp occlus/stenos precerebr arteries    |
| G6X..00 | Cereb infarct due/unspcf occlusn or sten/cerebr            |
| G6X..00 | Cereb infarct due/unspcf occlusn or sten/cerebrl artr      |
| Gyu6300 | [X]Cereb infarct due/unspcf occlusn or sten/cerebrl artr   |
| Gyu6400 | [X]Other cerebral infarction                               |
| Gyu6600 | [X]Occlusion and stenosis of other cerebral arteries       |
| Gyu6G00 | [X]Cereb infarct due unsp occlus/stenos precerebr arteries |
| 14AB.00 | H/O: TIA                                                   |

|         |                                                              |
|---------|--------------------------------------------------------------|
| 1JK..00 | Suspected transient ischaemic attack                         |
| 8CRB.00 | Transient ischaemic attack clinical management plan          |
| 8HBJ.00 | Stroke / transient ischaemic attack referral                 |
| 9Om..00 | Stroke/transient ischaemic attack monitoring administration  |
| 9Om0.00 | Stroke/transient ischaemic attack monitoring first letter    |
| 9Om1.00 | Stroke/transient ischaemic attack monitoring second letter   |
| 9Om2.00 | Stroke/transient ischaemic attack monitoring third letter    |
| 9Om3.00 | Stroke/transient ischaemic attack monitoring verbal invitati |
| 9Om4.00 | Stroke/transient ischaemic attack monitoring telephone invte |
| F580200 | Transient ischaemic deafness                                 |
| ZV12D00 | [V]Personal history of transient ischaemic attack            |
| G65..00 | Transient cerebral ischaemia                                 |
| G65..11 | Drop attack                                                  |
| G65..12 | Transient ischaemic attack                                   |
| G65..13 | Vertebro-basilar insufficiency                               |
| G650.00 | Basilar artery syndrome                                      |
| G650.11 | Insufficiency - basilar artery                               |
| G651.00 | Vertebral artery syndrome                                    |
| G651000 | Vertebro-basilar artery syndrome                             |
| G652.00 | Subclavian steal syndrome                                    |
| G653.00 | Carotid artery syndrome hemispheric                          |
| G654.00 | Multiple and bilateral precerebral artery syndromes          |
| G655.00 | Transient global amnesia                                     |
| G656.00 | Vertebrobasilar insufficiency                                |

|         |                                                              |
|---------|--------------------------------------------------------------|
| G657.00 | Carotid territory transient ischaemic attack                 |
| G65y.00 | Other transient cerebral ischaemia                           |
| G65z.00 | Transient cerebral ischaemia NOS                             |
| G65z000 | Impending cerebral ischaemia                                 |
| G65z100 | Intermittent cerebral ischaemia                              |
| G65zz00 | Transient cerebral ischaemia NOS                             |
| 14AB000 | H/O amaurosis fugax                                          |
| F423300 | Retinal microembolism                                        |
| F423400 | Hollenhorst plaque                                           |
| F423500 | Retinal partial arterial occlusion NOS                       |
| F423600 | Amaurosis fugax                                              |
| F423700 | Retinal transient arterial occlusion NOS                     |
| PAD     |                                                              |
| 66f3.00 | Aortic aneurysm monitoring                                   |
| 68B5100 | Aortic aneurysm screening abnormal                           |
| 7A11.00 | Replacement of aneurysmal bifurcation of aorta               |
| 7A11000 | Emerg repl aneurysm bifurc aorta by anast aorta to fem art   |
| 7A11100 | Replace aneurysm bifurc aorta by anast aorta to femoral art  |
| 7A11200 | Emerg repl aneurysm bifurc aorta by anast aorta to iliac a   |
| 7A11211 | Y graft of abdominal aortic aneurysm (emergency)             |
| 7A11300 | Replace aneurysm bifurc aorta by anast aorta to iliac artery |
| 7A11311 | Y graft abdominal aortic aneurysm                            |
| 7A11y00 | Replacement of aneurysmal bifurcation of aorta OS            |
| 7A11z00 | Replacement of aneurysmal bifurcation of aorta NOS           |
| 7A13.11 | Emergency repair of aortic aneurysm                          |
| 7A13400 | Emerg replace aneurysm abdom aorta by anast aorta/aorta NEC  |



|         |                                                              |
|---------|--------------------------------------------------------------|
| 7A13411 | Tube graft abdominal aortic aneurysm (emergency)             |
| 7A14.11 | Aortic aneurysm repair                                       |
| 7A14400 | Replace aneurysm abdominal aorta by anast aorta to aorta NEC |
| 7A14411 | Tube graft of abdominal aortic aneurysm                      |
| 7A1B000 | Endovascular stenting infrarenal abdominal aortic aneurysm   |
| 7A1B100 | Endovascular stenting of suprarenal aortic aneurysm          |
| 7A1B600 | Endovascular stenting for aortic aneurysm of bifurcation NEC |
| 7A1B800 | Endovascul insert stent infrarenal abdominal aortic aneurysm |
| 7A1B900 | Endovascular insertion stent for suprarenal aortic aneurysm  |
| 7A1BA00 | Endovascular insertion of stent for thoracic aortic aneurysm |
| 7A1BC00 | Endovas insert stent for aortic aneurysm of bifurcation NEC  |
| 7A1C000 | Endovas ins stent graft for infrarenal abdom aortic aneurysm |
| 7A1C100 | Endovas insert of stent graft for suprarenal aortic aneurysm |
| 7A1C200 | Endov insertion of stent graft for thoracic aortic aneurysm  |
| G71..00 | Aortic aneurysm                                              |
| G713.00 | Abdominal aortic aneurysm which has ruptured                 |
| G713.11 | Ruptured abdominal aortic aneurysm                           |
| G713000 | Ruptured suprarenal aortic aneurysm                          |
| G714.00 | Abdominal aortic aneurysm without mention of rupture         |
| G714.11 | AAA - Abdominal aortic aneurysm without mention of rupture   |
| G714000 | Juxtarenal aortic aneurysm                                   |
| G714200 | Infrarenal abdominal aortic aneurysm                         |
| G714300 | Aneurysm of suprarenal aorta                                 |
| G715.00 | Ruptured aortic aneurysm NOS                                 |
| G715000 | Thoracoabdominal aortic aneurysm, ruptured                   |
| G716.00 | Aortic aneurysm without mention of rupture NOS               |

|         |                                                              |
|---------|--------------------------------------------------------------|
| G716000 | Thoracoabdominal aortic aneurysm, without mention of rupture |
| G718.00 | Leaking abdominal aortic aneurysm                            |
| G71z.00 | Aortic aneurysm NOS                                          |
| Gyu7100 | [X]Aortic aneurysm of unspecified site, ruptured             |
| Gyu7200 | [X]Aortic aneurysm of unspecified site, nonruptured          |
| 7A20000 | Replacement of carotid artery using graft                    |
| 7A20100 | Intracranial bypass to carotid artery                        |
| 7A20200 | Bypass to carotid artery NEC                                 |
| 7A20300 | Endarterectomy and patch repair of carotid artery            |
| 7A20311 | Carotid endarterectomy and patch                             |
| 7A20400 | Endarterectomy of carotid artery NEC                         |
| 7A20500 | High-flow inter extrac intrac byp ext carot art mid cer art  |
| 7A20600 | Byp carot art anastom superfic tempor artery middle cere art |
| 7A20700 | Intracranial bypass from carotid artery NEC                  |
| 7A20y00 | Other specified reconstruction of carotid artery             |
| 7A20z00 | Reconstruction of carotid artery NOS                         |
| 7A21.00 | Other open operations on carotid artery                      |
| 7A21000 | Repair of carotid artery NEC                                 |
| 7A21100 | Ligation of carotid artery                                   |
| 7A22.00 | Transluminal operations on carotid artery                    |
| 7A22000 | Percutaneous transluminal angioplasty of carotid artery      |
| 7A22200 | Endovascular repair of carotid artery                        |
| 7A22300 | Percutaneous transluminal insertion stent carotid artery     |
| 7A22y00 | Other specified transluminal operation on carotid artery     |
| 7A22z00 | Transluminal operation on carotid artery NOS                 |
| G630.00 | Basilar artery occlusion                                     |

|         |                                                              |
|---------|--------------------------------------------------------------|
| G631.00 | Carotid artery occlusion                                     |
| G631.11 | Stenosis, carotid artery                                     |
| G631.12 | Thrombosis, carotid artery                                   |
| G634.00 | Carotid artery stenosis                                      |
| G63y.00 | Other precerebral artery occlusion                           |
| G63z.00 | Precerebral artery occlusion NOS                             |
| G653.00 | Carotid artery syndrome hemispheric                          |
| G670.00 | Cerebral atherosclerosis                                     |
| G670.11 | Precerebral atherosclerosis                                  |
| G677.00 | Occlusion/stenosis cerebral arts not result cerebral infarct |
| G70y000 | Carotid artery atherosclerosis                               |
| G70y000 | Carotid artery atherosclerosis                               |
| G70y011 | Carotid artery disease                                       |
| G70y011 | Carotid artery disease                                       |
| Gyu6500 | [X]Occlusion and stenosis of other precerebral arteries      |
| SP01200 | Mechanical complication of carotid artery bypass             |
| 14NB.00 | H/O: Peripheral vascular disease procedure                   |
| 662U.00 | Peripheral vascular disease monitoring                       |
| 9m1..00 | Peripheral vascular disease monitoring invitation            |
| 9N4h.00 | DNA - Did not attend peripheral vascular disease c           |
| G63..00 | Precerebral arterial occlusion                               |
| G63..12 | Stenosis of precerebral arteries                             |
| G70..00 | Atherosclerosis                                              |
| G70..11 | Arteriosclerosis                                             |
| G700.00 | Aortic atherosclerosis                                       |
| G700.11 | Aorto-iliac disease                                          |

|                  |                                                 |
|------------------|-------------------------------------------------|
| G702.00          | Extremity artery atheroma                       |
| G702000          | Monckeberg's medial sclerosis                   |
| G70z.00          | Arteriosclerotic vascular disease NOS           |
| G73..00          | Other peripheral vascular disease               |
| G73..11          | Peripheral ischaemic vascular disease           |
| G73..12          | Ischaemia of legs                               |
| G73..13          | Peripheral ischaemia                            |
| G733.00          | Ischaemic foot                                  |
| G734.00          | Peripheral arterial disease                     |
| G73y.00          | Other specified peripheral vascular disease     |
| G73yz00          | Other specified peripheral vascular disease NOS |
| G73z.00          | Peripheral vascular disease NOS                 |
| G73z000          | Intermittent claudication                       |
| G73z011          | Claudication                                    |
| G73z012          | Vascular claudication                           |
| G73zz00          | Peripheral vascular disease NOS                 |
| G784.00          | Occlusion of artery of lower limb               |
| G784000          | Occlusion of dorsalis pedis artery              |
| G784100          | Occlusion of anterior tibial artery             |
| G784200          | Occlusion of posterior tibial artery            |
| Gyu7400          | [X]Other specified peripheral vascular diseases |
| <b>Non-ASCVD</b> |                                                 |
| <b>T2DM</b>      |                                                 |
| 66A3.00          | Diabetic on diet only                           |
| 66A4.00          | Diabetic on oral treatment                      |
| 66Ao.00          | Diabetes type 2 review                          |

|         |                                                    |
|---------|----------------------------------------------------|
| 66At100 | Type II diabetic dietary review                    |
| 66At111 | Type 2 diabetic dietary review                     |
| C100100 | Diabetes mellitus, adult onset, no mention of comp |
| C100111 | Maturity onset diabetes                            |
| C100112 | Non-insulin dependent diabetes mellitus            |
| C101100 | Diabetes mellitus, adult onset, with ketoacidosis  |
| C102.00 | Diabetes mellitus with hyperosmolar coma           |
| C102100 | Diabetes mellitus, adult onset, with hyperosmolar  |
| C103100 | Diabetes mellitus, adult onset, with ketoacidotic  |
| C105100 | Diabetes mellitus, adult onset, + ophthalmic manif |
| C106100 | Diabetes mellitus, adult onset, + neurological man |
| C107100 | Diabetes mellitus, adult, + peripheral circulatory |
| C107200 | Diabetes mellitus, adult with gangrene             |
| C109.00 | Non-insulin dependent diabetes mellitus            |
| C109.11 | NIDDM - Non-insulin dependent diabetes mellitus    |
| C109.12 | Type 2 diabetes mellitus                           |
| C109.13 | Type II diabetes mellitus                          |
| C109200 | Non-insulin-dependent diabetes mellitus with neuro |
| C109211 | Type II diabetes mellitus with neurological compli |
| C109212 | Type 2 diabetes mellitus with neurological complic |
| C109300 | Non-insulin-dependent diabetes mellitus with multi |
| C109311 | Type II diabetes mellitus with multiple complicati |
| C109312 | Type 2 diabetes mellitus with multiple complicatio |
| C109400 | Non-insulin dependent diabetes mellitus with ulcer |
| C109411 | Type II diabetes mellitus with ulcer               |
| C109412 | Type 2 diabetes mellitus with ulcer                |

|         |                                                    |
|---------|----------------------------------------------------|
| C109500 | Non-insulin dependent diabetes mellitus with gangr |
| C109511 | Type II diabetes mellitus with gangrene            |
| C109512 | Type 2 diabetes mellitus with gangrene             |
| C109700 | Non-insulin dependent diabetes mellitus - poor con |
| C109711 | Type II diabetes mellitus - poor control           |
| C109712 | Type 2 diabetes mellitus - poor control            |
| C109900 | Non-insulin-dependent diabetes mellitus without co |
| C109911 | Type II diabetes mellitus without complication     |
| C109912 | Type 2 diabetes mellitus without complication      |
| C109A00 | Non-insulin dependent diabetes mellitus with monon |
| C109A11 | Type II diabetes mellitus with mononeuropathy      |
| C109A12 | Type 2 diabetes mellitus with mononeuropathy       |
| C109B00 | Non-insulin dependent diabetes mellitus with polyn |
| C109B11 | Type II diabetes mellitus with polyneuropathy      |
| C109B12 | Type 2 diabetes mellitus with polyneuropathy       |
| C109D00 | Non-insulin dependent diabetes mellitus with hypog |
| C109D11 | Type II diabetes mellitus with hypoglycaemic coma  |
| C109D12 | Type 2 diabetes mellitus with hypoglycaemic coma   |
| C109E00 | Non-insulin depend diabetes mellitus with diabetic |
| C109E11 | Type II diabetes mellitus with diabetic cataract   |
| C109E12 | Type 2 diabetes mellitus with diabetic cataract    |
| C109F11 | Type II diabetes mellitus with peripheral angiopat |
| C109F12 | Type 2 diabetes mellitus with peripheral angiopath |
| C109G00 | Non-insulin dependent diabetes mellitus with arthr |
| C109G11 | Type II diabetes mellitus with arthropathy         |
| C109G12 | Type 2 diabetes mellitus with arthropathy          |

|         |                                                    |
|---------|----------------------------------------------------|
| C109H11 | Type II diabetes mellitus with neuropathic arthrop |
| C109H12 | Type 2 diabetes mellitus with neuropathic arthrop  |
| C109J00 | Insulin treated Type 2 diabetes mellitus           |
| C109J11 | Insulin treated non-insulin dependent diabetes mel |
| C109J12 | Insulin treated Type II diabetes mellitus          |
| C109K00 | Hyperosmolar non-ketotic state in type 2 diabetes  |
| C10C.00 | Diabetes mellitus autosomal dominant               |
| C10C.11 | Maturity onset diabetes in youth                   |
| C10D.00 | Diabetes mellitus autosomal dominant type 2        |
| C10D.11 | Maturity onset diabetes in youth type 2            |
| C10F.00 | Type 2 diabetes mellitus                           |
| C10F.11 | Type II diabetes mellitus                          |
| C10F200 | Type 2 diabetes mellitus with neurological complic |
| C10F211 | Type II diabetes mellitus with neurological compli |
| C10F300 | Type 2 diabetes mellitus with multiple complicatio |
| C10F311 | Type II diabetes mellitus with multiple complicati |
| C10F400 | Type 2 diabetes mellitus with ulcer                |
| C10F411 | Type II diabetes mellitus with ulcer               |
| C10F500 | Type 2 diabetes mellitus with gangrene             |
| C10F511 | Type II diabetes mellitus with gangrene            |
| C10F700 | Type 2 diabetes mellitus - poor control            |
| C10F711 | Type II diabetes mellitus - poor control           |
| C10F900 | Type 2 diabetes mellitus without complication      |
| C10F911 | Type II diabetes mellitus without complication     |
| C10FA00 | Type 2 diabetes mellitus with mononeuropathy       |
| C10FA11 | Type II diabetes mellitus with mononeuropathy      |

|         |                                                    |
|---------|----------------------------------------------------|
| C10FB00 | Type 2 diabetes mellitus with polyneuropathy       |
| C10FB11 | Type II diabetes mellitus with polyneuropathy      |
| C10FD00 | Type 2 diabetes mellitus with hypoglycaemic coma   |
| C10FD11 | Type II diabetes mellitus with hypoglycaemic coma  |
| C10FE00 | Type 2 diabetes mellitus with diabetic cataract    |
| C10FE11 | Type II diabetes mellitus with diabetic cataract   |
| C10FF00 | Type 2 diabetes mellitus with peripheral angiopath |
| C10FF11 | Type II diabetes mellitus with peripheral angiopat |
| C10FG00 | Type 2 diabetes mellitus with arthropathy          |
| C10FG11 | Type II diabetes mellitus with arthropathy         |
| C10FH00 | Type 2 diabetes mellitus with neuropathic arthrop  |
| C10FH11 | Type II diabetes mellitus with neuropathic arthrop |
| C10FJ00 | Insulin treated Type 2 diabetes mellitus           |
| C10FJ11 | Insulin treated Type II diabetes mellitus          |
| C10FK00 | Hyperosmolar non-ketotic state in type 2 diabetes  |
| C10FK11 | Hyperosmolar non-ketotic state in type II diabetes |
| C10FN00 | Type 2 diabetes mellitus with ketoacidosis         |
| C10FN11 | Type II diabetes mellitus with ketoacidosis        |
| C10FP00 | Type 2 diabetes mellitus with ketoacidotic coma    |
| C10FP11 | Type II diabetes mellitus with ketoacidotic coma   |
| C10FR00 | Type 2 diabetes mellitus with gastroparesis        |
| C10FR11 | Type II diabetes mellitus with gastroparesis       |
| C10FS00 | Maternally inherited diabetes mellitus             |
| C10N.00 | Secondary diabetes mellitus                        |
| C10N000 | Secondary diabetes mellitus without complication   |
| C10y100 | Diabetes mellitus, adult, + other specified manife |



|         |                                                    |
|---------|----------------------------------------------------|
| C10z100 | Diabetes mellitus, adult onset, + unspecified comp |
| L180600 | Pre-existing diabetes mellitus, non-insulin-depend |
| C104100 | Diabetes mellitus, adult onset, with renal manifes |
| C109000 | Non-insulin-dependent diabetes mellitus with renal |
| C109011 | Type II diabetes mellitus with renal complications |
| C109012 | Type 2 diabetes mellitus with renal complications  |
| C109C00 | Non-insulin dependent diabetes mellitus with nephr |
| C109C11 | Type II diabetes mellitus with nephropathy         |
| C109C12 | Type 2 diabetes mellitus with nephropathy          |
| C10F000 | Type 2 diabetes mellitus with renal complications  |
| C10F011 | Type II diabetes mellitus with renal complications |
| C10FC00 | Type 2 diabetes mellitus with nephropathy          |
| C10FC11 | Type II diabetes mellitus with nephropathy         |
| C10FL00 | Type 2 diabetes mellitus with persistent proteinur |
| C10FL11 | Type II diabetes mellitus with persistent proteinu |
| C10FM00 | Type 2 diabetes mellitus with persistent microalbu |
| C10FM11 | Type II diabetes mellitus with persistent microalb |
| C109100 | Non-insulin-dependent diabetes mellitus with ophth |
| C109111 | Type II diabetes mellitus with ophthalmic complica |
| C109112 | Type 2 diabetes mellitus with ophthalmic complicat |
| C109600 | Non-insulin-dependent diabetes mellitus with retin |
| C109611 | Type II diabetes mellitus with retinopathy         |
| C109612 | Type 2 diabetes mellitus with retinopathy          |
| C10F100 | Type 2 diabetes mellitus with ophthalmic complicat |
| C10F111 | Type II diabetes mellitus with ophthalmic complica |
| C10F600 | Type 2 diabetes mellitus with retinopathy          |

|         |                                                    |
|---------|----------------------------------------------------|
| C10F611 | Type II diabetes mellitus with retinopathy         |
| C10FQ00 | Type 2 diabetes mellitus with exudative maculopath |
| C10FQ11 | Type II diabetes mellitus with exudative maculopat |
| T1DM    |                                                    |
| 66An.00 | Diabetes type 1 review                             |
| 66At000 | Type I diabetic dietary review                     |
| 66At011 | Type 1 diabetic dietary review                     |
| 66AV.00 | Diabetic on insulin and oral treatment             |
| C100000 | Diabetes mellitus, juvenile type, no mention of co |
| C100011 | Insulin dependent diabetes mellitus                |
| C101000 | Diabetes mellitus, juvenile type, with ketoacidosi |
| C102000 | Diabetes mellitus, juvenile type, with hyperosmola |
| C103000 | Diabetes mellitus, juvenile type, with ketoacidoti |
| C105000 | Diabetes mellitus, juvenile type, + ophthalmic man |
| C106000 | Diabetes mellitus, juvenile, + neurological manife |
| C107000 | Diabetes mellitus, juvenile +peripheral circulator |
| C108.00 | Insulin dependent diabetes mellitus                |
| C108.11 | IDDM-Insulin dependent diabetes mellitus           |
| C108.12 | Type 1 diabetes mellitus                           |
| C108.13 | Type I diabetes mellitus                           |
| C108200 | Insulin-dependent diabetes mellitus with neurologi |
| C108211 | Type I diabetes mellitus with neurological complic |
| C108212 | Type 1 diabetes mellitus with neurological complic |
| C108300 | Insulin dependent diabetes mellitus with multiple  |
| C108311 | Type I diabetes mellitus with multiple complicatio |
| C108312 | Type 1 diabetes mellitus with multiple complicatio |

|         |                                                    |
|---------|----------------------------------------------------|
| C108400 | Unstable insulin dependent diabetes mellitus       |
| C108411 | Unstable type I diabetes mellitus                  |
| C108412 | Unstable type 1 diabetes mellitus                  |
| C108500 | Insulin dependent diabetes mellitus with ulcer     |
| C108511 | Type I diabetes mellitus with ulcer                |
| C108512 | Type 1 diabetes mellitus with ulcer                |
| C108600 | Insulin dependent diabetes mellitus with gangrene  |
| C108611 | Type I diabetes mellitus with gangrene             |
| C108612 | Type 1 diabetes mellitus with gangrene             |
| C108800 | Insulin dependent diabetes mellitus - poor control |
| C108811 | Type I diabetes mellitus - poor control            |
| C108812 | Type 1 diabetes mellitus - poor control            |
| C108900 | Insulin dependent diabetes maturity onset          |
| C108911 | Type I diabetes mellitus maturity onset            |
| C108912 | Type 1 diabetes mellitus maturity onset            |
| C108A00 | Insulin-dependent diabetes without complication    |
| C108A11 | Type I diabetes mellitus without complication      |
| C108A12 | Type 1 diabetes mellitus without complication      |
| C108B00 | Insulin dependent diabetes mellitus with mononeuro |
| C108B11 | Type I diabetes mellitus with mononeuropathy       |
| C108B12 | Type 1 diabetes mellitus with mononeuropathy       |
| C108C00 | Insulin dependent diabetes mellitus with polyneuro |
| C108C11 | Type I diabetes mellitus with polyneuropathy       |
| C108C12 | Type 1 diabetes mellitus with polyneuropathy       |
| C108E00 | Insulin dependent diabetes mellitus with hypoglyca |
| C108E11 | Type I diabetes mellitus with hypoglycaemic coma   |

|         |                                                    |
|---------|----------------------------------------------------|
| C108E12 | Type 1 diabetes mellitus with hypoglycaemic coma   |
| C108F00 | Insulin dependent diabetes mellitus with diabetic  |
| C108F11 | Type I diabetes mellitus with diabetic cataract    |
| C108F12 | Type 1 diabetes mellitus with diabetic cataract    |
| C108G11 | Type I diabetes mellitus with peripheral angiopath |
| C108G12 | Type 1 diabetes mellitus with peripheral angiopath |
| C108H00 | Insulin dependent diabetes mellitus with arthropat |
| C108H11 | Type I diabetes mellitus with arthropathy          |
| C108H12 | Type 1 diabetes mellitus with arthropathy          |
| C108J11 | Type I diabetes mellitus with neuropathic arthropa |
| C108J12 | Type 1 diabetes mellitus with neuropathic arthropa |
| C10C.12 | Maturity onset diabetes in youth type 1            |
| C10E.00 | Type 1 diabetes mellitus                           |
| C10E.11 | Type I diabetes mellitus                           |
| C10E.12 | Insulin dependent diabetes mellitus                |
| C10E200 | Type 1 diabetes mellitus with neurological complic |
| C10E211 | Type I diabetes mellitus with neurological complic |
| C10E212 | Insulin-dependent diabetes mellitus with neurologi |
| C10E300 | Type 1 diabetes mellitus with multiple complicatio |
| C10E311 | Type I diabetes mellitus with multiple complicatio |
| C10E312 | Insulin dependent diabetes mellitus with multiple  |
| C10E400 | Unstable type 1 diabetes mellitus                  |
| C10E411 | Unstable type I diabetes mellitus                  |
| C10E412 | Unstable insulin dependent diabetes mellitus       |
| C10E500 | Type 1 diabetes mellitus with ulcer                |
| C10E511 | Type I diabetes mellitus with ulcer                |

|         |                                                    |
|---------|----------------------------------------------------|
| C10E512 | Insulin dependent diabetes mellitus with ulcer     |
| C10E600 | Type 1 diabetes mellitus with gangrene             |
| C10E611 | Type I diabetes mellitus with gangrene             |
| C10E612 | Insulin dependent diabetes mellitus with gangrene  |
| C10E800 | Type 1 diabetes mellitus - poor control            |
| C10E811 | Type I diabetes mellitus - poor control            |
| C10E812 | Insulin dependent diabetes mellitus - poor control |
| C10E900 | Type 1 diabetes mellitus maturity onset            |
| C10E911 | Type I diabetes mellitus maturity onset            |
| C10E912 | Insulin dependent diabetes maturity onset          |
| C10EA00 | Type 1 diabetes mellitus without complication      |
| C10EA11 | Type I diabetes mellitus without complication      |
| C10EA12 | Insulin-dependent diabetes without complication    |
| C10EB00 | Type 1 diabetes mellitus with mononeuropathy       |
| C10EB11 | Type I diabetes mellitus with mononeuropathy       |
| C10EB12 | Insulin dependent diabetes mellitus with mononeuro |
| C10EC00 | Type 1 diabetes mellitus with polyneuropathy       |
| C10EC11 | Type I diabetes mellitus with polyneuropathy       |
| C10EC12 | Insulin dependent diabetes mellitus with polyneuro |
| C10EE00 | Type 1 diabetes mellitus with hypoglycaemic coma   |
| C10EE11 | Type I diabetes mellitus with hypoglycaemic coma   |
| C10EE12 | Insulin dependent diabetes mellitus with hypoglyca |
| C10EF00 | Type 1 diabetes mellitus with diabetic cataract    |
| C10EF11 | Type I diabetes mellitus with diabetic cataract    |
| C10EF12 | Insulin dependent diabetes mellitus with diabetic  |
| C10EG00 | Type 1 diabetes mellitus with peripheral angiopath |

|         |                                                    |
|---------|----------------------------------------------------|
| C10EG11 | Type I diabetes mellitus with peripheral angiopath |
| C10EH00 | Type 1 diabetes mellitus with arthropathy          |
| C10EH11 | Type I diabetes mellitus with arthropathy          |
| C10EH12 | Insulin dependent diabetes mellitus with arthropat |
| C10EJ00 | Type 1 diabetes mellitus with neuropathic arthropa |
| C10EJ11 | Type I diabetes mellitus with neuropathic arthropa |
| C10EK00 | Type 1 diabetes mellitus with persistent proteinur |
| C10EK11 | Type I diabetes mellitus with persistent proteinur |
| C10EL00 | Type 1 diabetes mellitus with persistent microalbu |
| C10EL11 | Type I diabetes mellitus with persistent microalbu |
| C10EM00 | Type 1 diabetes mellitus with ketoacidosis         |
| C10EM11 | Type I diabetes mellitus with ketoacidosis         |
| C10EN00 | Type 1 diabetes mellitus with ketoacidotic coma    |
| C10EN11 | Type I diabetes mellitus with ketoacidotic coma    |
| C10EQ00 | Type 1 diabetes mellitus with gastroparesis        |
| C10EQ11 | Type I diabetes mellitus with gastroparesis        |
| C10y000 | Diabetes mellitus, juvenile, + other specified man |
| C10z000 | Diabetes mellitus, juvenile type, + unspecified co |
| L180500 | Pre-existing diabetes mellitus, insulin-dependent  |
| C104000 | Diabetes mellitus, juvenile type, with renal manif |
| C108000 | Insulin-dependent diabetes mellitus with renal com |
| C108011 | Type I diabetes mellitus with renal complications  |
| C108012 | Type 1 diabetes mellitus with renal complications  |
| C108D00 | Insulin dependent diabetes mellitus with nephropat |
| C108D11 | Type I diabetes mellitus with nephropathy          |
| C108D12 | Type 1 diabetes mellitus with nephropathy          |

|         |                                                    |
|---------|----------------------------------------------------|
| C10E000 | Type 1 diabetes mellitus with renal complications  |
| C10E011 | Type I diabetes mellitus with renal complications  |
| C10E012 | Insulin-dependent diabetes mellitus with renal com |
| C10ED00 | Type 1 diabetes mellitus with nephropathy          |
| C10ED11 | Type I diabetes mellitus with nephropathy          |
| C10ED12 | Insulin dependent diabetes mellitus with nephropat |
| C108100 | Insulin-dependent diabetes mellitus with ophthalmi |
| C108111 | Type I diabetes mellitus with ophthalmic complicat |
| C108112 | Type 1 diabetes mellitus with ophthalmic complicat |
| C108700 | Insulin dependent diabetes mellitus with retinopat |
| C108711 | Type I diabetes mellitus with retinopathy          |
| C108712 | Type 1 diabetes mellitus with retinopathy          |
| C10E100 | Type 1 diabetes mellitus with ophthalmic complicat |
| C10E111 | Type I diabetes mellitus with ophthalmic complicat |
| C10E112 | Insulin-dependent diabetes mellitus with ophthalmi |
| C10E700 | Type 1 diabetes mellitus with retinopathy          |
| C10E711 | Type I diabetes mellitus with retinopathy          |
| C10E712 | Insulin dependent diabetes mellitus with retinopat |
| C10EP00 | Type 1 diabetes mellitus with exudative maculopath |
| C10EP11 | Type I diabetes mellitus with exudative maculopath |
| CKD     |                                                    |
| 1Z12.00 | Chronic kidney disease stage 3                     |
| 1Z15.00 | Chronic kidney disease stage 3A                    |
| 1Z16.00 | Chronic kidney disease stage 3B                    |
| 1Z1B.00 | Chronic kidney disease stage 3 with proteinuria    |
| 1Z1B.11 | CKD stage 3 with proteinuria                       |

|         |                                                     |
|---------|-----------------------------------------------------|
| 1Z1C.00 | Chronic kidney disease stage 3 without proteinuria  |
| 1Z1C.11 | CKD stage 3 without proteinuria                     |
| 1Z1D.00 | Chronic kidney disease stage 3A with proteinuria    |
| 1Z1D.11 | CKD stage 3A with proteinuria                       |
| 1Z1E.00 | Chronic kidney disease stage 3A without proteinuria |
| 1Z1E.11 | CKD stage 3A without proteinuria                    |
| 1Z1F.00 | Chronic kidney disease stage 3B with proteinuria    |
| 1Z1F.11 | CKD stage 3B with proteinuria                       |
| 1Z1G.00 | Chronic kidney disease stage 3B without proteinuria |
| 1Z1G.11 | CKD stage 3B without proteinuria                    |
| K053.00 | Chronic kidney disease stage 3                      |
| 1Z1H.00 | Chronic kidney disease stage 4 with proteinuria     |
| 1Z1H.11 | CKD stage 4 with proteinuria                        |
| 1Z1J.00 | Chronic kidney disease stage 4 without proteinuria  |
| 1Z1J.11 | CKD stage 4 without proteinuria                     |
| K054.00 | Chronic kidney disease stage 4                      |
| 1Z1K.00 | Chronic kidney disease stage 5 with proteinuria     |
| 1Z1K.11 | CKD stage 5 with proteinuria                        |
| 1Z1L.00 | Chronic kidney disease stage 5 without proteinuria  |
| 1Z1L.11 | CKD stage 5 without proteinuria                     |
| 7L1A.11 | Dialysis for renal failure                          |
| 7L1A000 | Renal dialysis                                      |
| 7L1A100 | Peritoneal dialysis                                 |
| 7L1A200 | Haemodialysis NEC                                   |
| 7L1A400 | Automated peritoneal dialysis                       |
| 7L1A500 | Continuous ambulatory peritoneal dialysis           |



|         |                                                            |
|---------|------------------------------------------------------------|
| 7L1A600 | Peritoneal dialysis NEC                                    |
| K055.00 | Chronic kidney disease stage 5                             |
| SP06B00 | Continuous ambulatory peritoneal dialysis associated perit |
| SP0E.00 | Disorders associated with peritoneal dialysis              |
| K05..12 | End stage renal failure                                    |
| K050.00 | End stage renal failure                                    |

ACS, acute coronary syndrome; ASCVD, atherosclerotic cardiovascular disease; CHD, coronary heart disease; CKD, chronic kidney disease; PAD, peripheral arterial disease; T1DM, type 1 diabetes mellitus; T2DM, type 2 diabetes mellitus

**SUPPLEMENTAL TABLE S2. Categorisation of Lipid Modifying Therapy (LMT)**

---

|                         |                                                                                                                                                                                         |
|-------------------------|-----------------------------------------------------------------------------------------------------------------------------------------------------------------------------------------|
| High-intensity statin   | Atorvastatin 20, 40, and 80 mg; rosuvastatin 10, 20, and 40 mg; simvastatin 80 mg                                                                                                       |
| Medium-intensity statin | Atorvastatin 10 mg; rosuvastatin 5 mg; simvastatin 20 and 40 mg; fluvastatin 80 mg                                                                                                      |
| Low-intensity statin    | Simvastatin 10 mg; pravastatin 10, 20, and 40 mg; fluvastatin 20 and 40 mg                                                                                                              |
| Nonstatin LMT           | Ezetimibe, nicotinic acid (niacin, acipimox), fibrates (benzafibrate, ciprofibrate, fenofibrate, and gemfibrozil), bile acid sequestrants (cholestyramine, colesevelam, and colestipol) |

---

**SUPPLEMENTAL TABLE S3. Baseline Characteristics for the Overall ASCVD Cohort and Prevalent Subgroups**

|                                          | <b>Recent ACS<br/>(n = 3112)</b> | <b>Other CHD<br/>(n = 60 347)</b> | <b>Ischaemic stroke / TIA<br/>(n = 26 146)</b> | <b>PAD<br/>(n = 19 830)</b> | <b>Total ASCVD<br/>(n = 91 479)</b> |
|------------------------------------------|----------------------------------|-----------------------------------|------------------------------------------------|-----------------------------|-------------------------------------|
| <b>Demographic characteristics</b>       |                                  |                                   |                                                |                             |                                     |
| Age, mean, years (SD)                    | 67.8 (12.8)                      | 72.6 (10.6)                       | 73.9 (11.5)                                    | 73.5 (10.3)                 | 72.6 (10.9)                         |
| Male, %                                  | 66.5                             | 63.7                              | 52.3                                           | 65.4                        | 60.7                                |
| Social deprivation index*, mean (SD)     | 2.7 (1.4)                        | 2.7 (1.4)                         | 2.6 (1.4)                                      | 2.8 (1.4)                   | 2.7 (1.4)                           |
| Ethnicity, %                             |                                  |                                   |                                                |                             |                                     |
| White                                    | 28.3                             | 30.3                              | 29.5                                           | 30.6                        | 30.0                                |
| South Asian†                             | 15.1                             | 14.0                              | 13.8                                           | 12.9                        | 13.9                                |
| Black Caribbean / African                | 0.3                              | 0.3                               | 0.5                                            | 0.4                         | 0.3                                 |
| Chinese                                  | 0.0                              | 0.1                               | 0.1                                            | 0.1                         | 0.1                                 |
| Not recorded                             | 56.4                             | 55.4                              | 56.1                                           | 56.1                        | 55.8                                |
| Current smoker, %                        | 15.2                             | 12.1                              | 13.5                                           | 26.6                        | 14.1                                |
| BMI, mean, kg/m <sup>2</sup> (SD)        | 28.4 (5.4)                       | 28.5 (5.3)                        | 27.8 (5.4)                                     | 27.7 (5.3)                  | 28.3 (5.4)                          |
| Systolic BP, mean (SD)                   | 128.9 (17.8)                     | 131.4 (15.8)                      | 132.8 (16.0)                                   | 133.5 (16.4)                | 132.1 (15.9)                        |
| <b>Baseline clinical characteristics</b> |                                  |                                   |                                                |                             |                                     |
| Recent ACS, %                            | 100.0                            | 3.3                               | 0.9                                            | 1.6                         | 3.4                                 |
| Other CHD, %                             | 64.2                             | 100.0                             | 24.0                                           | 34.0                        | 66.0                                |
| Ischaemic stroke / TIA, %                | 7.6                              | 10.4                              | 100.0                                          | 21.5                        | 28.6                                |
| PAD, %                                   | 10.1                             | 11.2                              | 16.3                                           | 100.0                       | 21.7                                |
| DM, %                                    | 27.0                             | 30.0                              | 27.3                                           | 34.5                        | 29.4                                |
| Hypertension, %                          | 50.4                             | 61.2                              | 64.0                                           | 66.7                        | 61.5                                |
| History of CHF, %                        | 14.0                             | 11.3                              | 6.9                                            | 8.9                         | 9.1                                 |
| CKD stage III                            | 17.2                             | 24.4                              | 22.1                                           | 23.0                        | 23.5                                |
| CKD stage IV- V‡                         | 0.2                              | 0.3                               | 0.2                                            | 0.4                         | 0.2                                 |

| <b>Concomitant medication use<sup>¶</sup></b> |      |      |      |      |      |
|-----------------------------------------------|------|------|------|------|------|
| Beta-blockers, %                              | 81.4 | 60.1 | 23.5 | 22.4 | 48.7 |
| ACEI/ARBs, %                                  | 85.0 | 65.3 | 52.1 | 52.4 | 61.7 |
| Antiplatelets, <sup>#</sup> %                 | 52.5 | 13.5 | 29.7 | 15.4 | 18.5 |

\* Social deprivation index is defined by Townsend deprivation index score, 1 = most affluent and 5 = least affluent;

† Includes Indian, Pakistani, Bangladeshi, and other South Asian individuals; ‡ Stage V CKD includes end-stage renal disease and dialysis. ¶ Medication use on index date. # Clopidogrel/ticagrelor/prasugrel

ACEI, angiotensin converting enzyme inhibitor; ACS, acute coronary syndrome; ARB, angiotensin II receptor blocker; ASCVD, atherosclerotic cardiovascular disease; BMI, body-mass index; BP, blood pressure; CHD, coronary heart disease; CHF, congestive heart failure; CKD, chronic kidney disease; DM, diabetes mellitus; PAD, peripheral arterial disease; SD, standard deviation; TIA, transient ischaemic attack

### SUPPLEMENTAL TABLE S4. Use of LMT in the Overall ASCVD Cohort and Prevalent Subgroups

|                                          | Recent ACS<br>(n = 3112) | Other CHD<br>(n = 60 347) | Ischaemic stroke / TIA<br>(n = 26 146) | PAD<br>(n = 19 830) | Total ASCVD<br>(n = 91 479) |
|------------------------------------------|--------------------------|---------------------------|----------------------------------------|---------------------|-----------------------------|
| High-intensity statin, %                 | 62.4                     | 35.5                      | 24.7                                   | 30.2                | 31.4                        |
| Monotherapy, %                           | 93.3                     | 91.9                      | 92.6                                   | 91.1                | 92.2                        |
| Plus Ezetimibe, %                        | 1.0                      | 4.5                       | 3.5                                    | 4.7                 | 4.1                         |
| Plus other nonstatin LMT, %              | 5.8                      | 3.5                       | 3.9                                    | 4.2                 | 3.7                         |
| Medium-intensity statin, %               | 22.6                     | 40.7                      | 44.8                                   | 42.8                | 42.1                        |
| Monotherapy, %                           | 98.6                     | 97.9                      | 98.4                                   | 98.4                | 98.2                        |
| Plus Ezetimibe, %                        | 0.6                      | 1.2                       | 0.9                                    | 0.8                 | 1.0                         |
| Plus other nonstatin LMT, %              | 0.9                      | 0.9                       | 0.7                                    | 0.8                 | 0.8                         |
| Low-intensity statin, %                  | 2.1                      | 5.7                       | 5.8                                    | 5.4                 | 5.6                         |
| Monotherapy, %                           | 93.8                     | 95.8                      | 96.6                                   | 96.3                | 96.3                        |
| Plus Ezetimibe, %                        | 6.3                      | 3.3                       | 2.6                                    | 3.0                 | 2.8                         |
| Plus other nonstatin LMT, %              | 0.0                      | 0.9                       | 0.9                                    | 0.7                 | 0.8                         |
| Nonstatins only, %                       | 0.9                      | 2.0                       | 1.8                                    | 1.9                 | 1.9                         |
| Ezetimibe, monotherapy, %                | 70.4                     | 61.5                      | 65.4                                   | 60.1                | 61.6                        |
| Other nonstatin LMT, %                   | 29.6                     | 38.5                      | 34.6                                   | 39.9                | 38.4                        |
| Not currently treated by LMT, %          | 12.1                     | 16.0                      | 22.9                                   | 19.7                | 19.0                        |
| Previously on high-intensity statin, %   | 20.7                     | 16.7                      | 10.1                                   | 12.7                | 13.2                        |
| Previously on medium-intensity statin, % | 22.8                     | 40.5                      | 38.9                                   | 36.7                | 38.4                        |
| Previously on low-intensity statin, %    | 5.6                      | 9.9                       | 7.7                                    | 7.6                 | 8.5                         |
| Previously on nonstatin LMT, %           | 4.8                      | 7.2                       | 5.6                                    | 5.7                 | 5.9                         |
| No previous LMT, %                       | 46.1                     | 25.7                      | 37.7                                   | 37.3                | 34.0                        |

Numbers in the grey bars denote absolute percentages, and add up to 100% vertically. Numbers in the white bars are relative percentages of the absolute percentages in the grey bars.

ACS, acute coronary syndrome; ASCVD, atherosclerotic cardiovascular disease; CHD, coronary heart disease; LMT, lipid modifying therapy; PAD, peripheral arterial disease; TIA, transient ischaemic attack

**SUPPLEMENTAL TABLE S5. Lipid Level Achievement by LMT in the Overall ASCVD Cohort and Prevalent Subgroups**

|                          | Recent ACS<br>(n = 3112) | Other CHD<br>(n = 58 348) | Ischaemic stroke / TIA<br>(n = 19 785) | PAD<br>(n = 10 234) | Total ASCVD<br>(n = 91 479) |
|--------------------------|--------------------------|---------------------------|----------------------------------------|---------------------|-----------------------------|
| Mean LDL-C, mmol/L       |                          |                           |                                        |                     |                             |
| High-intensity statin    | 1.8                      | 2.1                       | 2.1                                    | 2.1                 | 2.1                         |
| Medium-intensity statin  | 2.0                      | 2.0                       | 2.0                                    | 2.1                 | 2.0                         |
| Low-intensity statin     | 2.5                      | 2.3                       | 2.4                                    | 2.4                 | 2.3                         |
| Nonstatin LMT only       | 3.0                      | 3.0                       | 3.0                                    | 3.0                 | 3.0                         |
| No current LMT           | 2.9                      | 3.1                       | 3.1                                    | 3.1                 | 3.1                         |
| Total                    | 2.0                      | 2.2                       | 2.3                                    | 2.4                 | 2.3                         |
| LDL-C <1.8 mmol/L, %     |                          |                           |                                        |                     |                             |
| High-intensity statin    | 52.6                     | 36.8                      | 35.1                                   | 33.2                | 37.3                        |
| Medium-intensity statin  | 38.7                     | 38.2                      | 37.8                                   | 35.1                | 37.8                        |
| Low-intensity statin     | 23.4                     | 23.6                      | 21.4                                   | 21.5                | 22.9                        |
| Nonstatin LMT only       | 11.1                     | 6.3                       | 4.7                                    | 9.2                 | 6.4                         |
| No current LMT           | 14.9                     | 8.7                       | 6.5                                    | 7.4                 | 8.0                         |
| Total                    | 43.9                     | 31.5                      | 27.9                                   | 26.4                | 30.6                        |
| Mean non-HDL-C, mmol/L   |                          |                           |                                        |                     |                             |
| High-intensity statin    | 2.4                      | 2.8                       | 2.8                                    | 2.9                 | 2.8                         |
| Medium-intensity statin  | 2.7                      | 2.6                       | 2.6                                    | 2.7                 | 2.6                         |
| Low-intensity statin     | 3.2                      | 2.9                       | 3.0                                    | 3.0                 | 2.9                         |
| Nonstatin LMT only       | 3.9                      | 3.7                       | 3.7                                    | 3.7                 | 3.7                         |
| No current LMT           | 3.6                      | 3.7                       | 3.8                                    | 3.8                 | 3.8                         |
| Total                    | 2.6                      | 2.9                       | 3.0                                    | 3.1                 | 2.9                         |
| Non-HDL-C <2.6 mmol/L, % |                          |                           |                                        |                     |                             |
| High-intensity statin    | 64.8                     | 47.2                      | 46.6                                   | 42.9                | 47.9                        |
| Medium-intensity statin  | 50.0                     | 51.8                      | 54.9                                   | 48.6                | 52.1                        |
| Low-intensity statin     | 26.6                     | 37.6                      | 36.6                                   | 33.1                | 36.8                        |
| Nonstatin LMT only       | 7.4                      | 12.3                      | 10.8                                   | 14.1                | 12.1                        |
| No current LMT           | 20.7                     | 14.9                      | 13.8                                   | 13.6                | 14.5                        |
| Total                    | 54.8                     | 42.6                      | 41.0                                   | 36.9                | 42.0                        |

ACS, acute coronary syndrome; ASCVD, atherosclerotic cardiovascular disease; CHD, coronary heart disease; HDL-C, high-density lipoprotein cholesterol; LDL-C, low-density lipoprotein cholesterol; LMT, lipid modifying therapy; PAD, peripheral arterial disease; TIA, transient ischaemic attack

**SUPPLEMENTAL TABLE S6. Lipid Level Achievement by LMT in the Overall ASCVD Cohort and Hierarchical Subgroups**

|                          | Recent ACS<br>(n = 3112) | Other CHD<br>(n = 60 347) | Ischaemic stroke / TIA<br>(n = 26 146) | PAD<br>(n = 19 830) | Total ASCVD<br>(n = 91 479) |
|--------------------------|--------------------------|---------------------------|----------------------------------------|---------------------|-----------------------------|
| Mean LDL-C, mmol/L       |                          |                           |                                        |                     |                             |
| High-intensity statin    | 1.8                      | 2.1                       | 2.1                                    | 2.1                 | 2.1                         |
| Medium-intensity statin  | 2.0                      | 2.0                       | 2.0                                    | 2.0                 | 2.0                         |
| Low-intensity statin     | 2.5                      | 2.3                       | 2.3                                    | 2.3                 | 2.3                         |
| Nonstatin LMT only       | 3.0                      | 3.0                       | 3.0                                    | 3.0                 | 3.0                         |
| No current LMT           | 2.9                      | 3.1                       | 3.1                                    | 3.1                 | 3.1                         |
| Total                    | 2.0                      | 2.2                       | 2.3                                    | 2.3                 | 2.3                         |
| LDL-C <1.8 mmol/L, %     |                          |                           |                                        |                     |                             |
| High-intensity statin    | 52.6                     | 37.7                      | 36.2                                   | 36.6                | 37.3                        |
| Medium-intensity statin  | 38.7                     | 38.3                      | 38.9                                   | 37.3                | 37.8                        |
| Low-intensity statin     | 23.4                     | 23.5                      | 23.6                                   | 22.0                | 22.9                        |
| Nonstatin LMT only       | 11.1                     | 6.3                       | 5.2                                    | 9.4                 | 6.4                         |
| No current LMT           | 14.9                     | 8.9                       | 7.0                                    | 8.4                 | 8.0                         |
| Total                    | 43.8                     | 32.0                      | 28.4                                   | 26.4                | 30.6                        |
| Mean non-HDL-C, mmol/L   |                          |                           |                                        |                     |                             |
| High-intensity statin    | 2.4                      | 2.7                       | 2.8                                    | 2.8                 | 2.8                         |
| Medium-intensity statin  | 2.7                      | 2.6                       | 2.6                                    | 2.7                 | 2.6                         |
| Low-intensity statin     | 3.2                      | 2.9                       | 2.9                                    | 3.0                 | 2.9                         |
| Nonstatin LMT only       | 3.9                      | 3.7                       | 3.7                                    | 3.7                 | 3.7                         |
| No current LMT           | 3.6                      | 3.7                       | 3.8                                    | 3.7                 | 3.8                         |
| Total                    | 2.6                      | 2.9                       | 3.0                                    | 3.0                 | 2.9                         |
| Non-HDL-C <2.6 mmol/L, % |                          |                           |                                        |                     |                             |
| High-intensity statin    | 64.8                     | 48.2                      | 47.1                                   | 45.9                | 47.9                        |
| Medium-intensity statin  | 50.0                     | 51.8                      | 55.0                                   | 51.0                | 52.1                        |
| Low-intensity statin     | 26.6                     | 37.4                      | 39.5                                   | 34.6                | 36.8                        |
| Nonstatin LMT only       | 7.4                      | 12.3                      | 11.7                                   | 14.4                | 12.1                        |
| No current LMT           | 20.7                     | 15.0                      | 14.3                                   | 14.9                | 14.5                        |
| Total                    | 54.5                     | 43.0                      | 41.5                                   | 36.9                | 42.0                        |

ACS, acute coronary syndrome; ASCVD, atherosclerotic cardiovascular disease; CHD, coronary heart disease; HDL-C, high-density lipoprotein cholesterol; LDL-C, low-density lipoprotein cholesterol; LMT, lipid modifying therapy; PAD, peripheral arterial disease; TIA, transient ischaemic attack

**SUPPLEMENTAL TABLE S7. Lipid Level Achievement by LMT in the Overall Non-ASCVD Cohort and Subgroups**

|                             | T2DM and<br>QRISK2<br>>10% with<br>CKD<br>(n = 11<br>102) | T2DM and<br>QRISK 2<br>>10%<br>without<br>CKD<br>(n = 52<br>556) | T1DM and<br>age >40<br>years with<br>CKD<br>(n = 749) | T1DM and<br>age >40<br>years<br>without<br>CKD<br>(n = 4204) | CKD<br>without<br>DM<br>criteria<br>(n = 23<br>475) | Total non-<br>ASCVD<br>(n = 92<br>086) |
|-----------------------------|-----------------------------------------------------------|------------------------------------------------------------------|-------------------------------------------------------|--------------------------------------------------------------|-----------------------------------------------------|----------------------------------------|
| Mean LDL-C, mmol/L          |                                                           |                                                                  |                                                       |                                                              |                                                     |                                        |
| High-intensity statin       | 2.0                                                       | 2.1                                                              | 1.9                                                   | 2.1                                                          | 2.2                                                 | 2.1                                    |
| Medium-intensity statin     | 1.9                                                       | 2.0                                                              | 1.8                                                   | 2.0                                                          | 2.2                                                 | 2.0                                    |
| Low-intensity statin        | 2.1                                                       | 2.3                                                              | 2.0                                                   | 2.3                                                          | 2.5                                                 | 2.3                                    |
| Nonstatin LMT only          | 2.8                                                       | 2.9                                                              | 2.5                                                   | 2.7                                                          | 3.1                                                 | 2.9                                    |
| No current LMT              | 2.9                                                       | 3.0                                                              | 2.7                                                   | 2.7                                                          | 3.3                                                 | 3.1                                    |
| Total                       | 2.2                                                       | 2.4                                                              | 2.1                                                   | 2.3                                                          | 2.8                                                 | 2.4                                    |
| LDL-C <1.8 mmol/L, %        |                                                           |                                                                  |                                                       |                                                              |                                                     |                                        |
| High-intensity statin       | 41.8                                                      | 36.7                                                             | 41.9                                                  | 36.2                                                         | 29.9                                                | 36.4                                   |
| Medium-intensity statin     | 49.9                                                      | 41.3                                                             | 52.0                                                  | 35.3                                                         | 29.1                                                | 39.7                                   |
| Low-intensity statin        | 32.5                                                      | 26.6                                                             | 45.9                                                  | 25.1                                                         | 16.3                                                | 25.1                                   |
| Nonstatin LMT only          | 11.3                                                      | 5.9                                                              | 20.7                                                  | 8.1                                                          | 5.2                                                 | 7.1                                    |
| No current LMT              | 10.3                                                      | 7.5                                                              | 17.6                                                  | 11.5                                                         | 3.7                                                 | 6.7                                    |
| Total                       | 35.7                                                      | 28.4                                                             | 39.8                                                  | 25.9                                                         | 15.7                                                | 26.0                                   |
| Mean non-HDL-C, mmol/L      |                                                           |                                                                  |                                                       |                                                              |                                                     |                                        |
| High-intensity statin       | 2.8                                                       | 2.9                                                              | 2.6                                                   | 2.7                                                          | 2.9                                                 | 2.9                                    |
| Medium-intensity statin     | 2.6                                                       | 2.7                                                              | 2.4                                                   | 2.6                                                          | 2.8                                                 | 2.7                                    |
| Low-intensity statin        | 2.9                                                       | 3.0                                                              | 2.6                                                   | 2.9                                                          | 3.1                                                 | 3.0                                    |
| Nonstatin LMT only          | 3.5                                                       | 3.8                                                              | 3.2                                                   | 3.4                                                          | 3.8                                                 | 3.7                                    |
| No current LMT              | 3.6                                                       | 3.8                                                              | 3.3                                                   | 3.2                                                          | 3.9                                                 | 3.8                                    |
| Total                       | 2.94                                                      | 3.1                                                              | 2.7                                                   | 2.9                                                          | 3.4                                                 | 3.2                                    |
| Non-HDL-C <2.6 mmol/L,<br>% |                                                           |                                                                  |                                                       |                                                              |                                                     |                                        |
| High-intensity statin       | 44.5                                                      | 40.8                                                             | 51.4                                                  | 49.4                                                         | 39.5                                                | 41.8                                   |
| Medium-intensity statin     | 57.5                                                      | 48.9                                                             | 69.1                                                  | 57.6                                                         | 43.2                                                | 49.4                                   |
| Low-intensity statin        | 42.7                                                      | 35.2                                                             | 51.4                                                  | 43.6                                                         | 27.0                                                | 34.8                                   |
| Nonstatin LMT only          | 12.7                                                      | 8.7                                                              | 31.0                                                  | 17.6                                                         | 8.1                                                 | 10.1                                   |
| No current LMT              | 16.1                                                      | 12.1                                                             | 26.8                                                  | 26.2                                                         | 8.5                                                 | 11.9                                   |
| Total                       | 41.9                                                      | 34.3                                                             | 52.0                                                  | 43.2                                                         | 24.3                                                | 33.2                                   |



ASCVD, atherosclerotic cardiovascular disease; CKD, chronic kidney disease; HDL-C, high-density lipoprotein cholesterol; LDL-C, low-density lipoprotein cholesterol; LMT, lipid modifying therapy; T1DM, type 1 diabetes mellitus; T2DM, type 2 diabetes mellitus
